# Supplementary material for: Mitochondrial substitution rates estimation for molecular clock analyses in modern birds based on full mitochondrial genomes
Source: bioRxiv or medRxiv preprint supplement (doi:10.1101/855833), 2019-11-26
Supplement: Supplementary file [file media-1.pdf]

**Supplementary material 1: Genbank accession numbers for the species' mitochondrial genomes.**

| Species                                | Accession number    |
|----------------------------------------|---------------------|
| <i>Abrornis inornata(Phylloscopus)</i> | NC_024726           |
| <i>Acanthis flammea</i>                | NC_027285           |
| <i>Acanthisitta chloris</i>            | AY325307            |
| <i>Accipiter gentilis</i>              | NC_011818           |
| <i>Accipiter gularis</i>               | KX585864 / EU583261 |
| <i>Accipiter nisus</i>                 | NC_025580           |
| <i>Accipiter soloensis</i>             | KJ680303            |
| <i>Accipiter virgatus</i>              | NC_026082           |
| <i>Aceros corrugatus</i>               | HM755883            |
| <i>Aceros waldeni</i>                  | NC_015085           |
| <i>Acridotheres cristatellus</i>       | NC_015613           |
| <i>Acridotheres tristis (Sturnus)</i>  | NC_015195           |
| <i>Acrocephalus scirpaceus</i>         | NC_010227           |
| <i>Acryllium vulturinum</i>            | NC_014180           |
| <i>Aegithalos bonvaloti</i>            | NC_024267           |
| <i>Aegithalos caudatus</i>             | KF951088            |
| <i>Aegithalos concinnus</i>            | KF951092            |
| <i>Aegithalos fuliginosus</i>          | NC_024266           |
| <i>Aegithalos glaucogularis</i>        | NC_024268           |
| <i>Aegotheles cristatus</i>            | NC_011718           |
| <i>Aegypius monachus</i>               | KF682364            |
| <i>Aepyornis hildebrandti</i>          | KJ749824            |
| <i>Aethopyga gouldiae</i>              | NC_027241           |
| <i>Agapornis roseicollis</i>           | NC_011708           |
| <i>Agelaius phoeniceus</i>             | NC_018801           |
| <i>Aix galericulata</i>                | NC_023969           |
| <i>Akialoa obscura</i>                 | NC_031349           |
| <i>Alauda arvensis</i>                 | NC_020425           |
| <i>Alectoris chukar</i>                | NC_020585           |
| <i>Alectura lathamii</i>               | NC_007227           |
| <i>Amaurornis akool</i>                | NC_023982           |
| <i>Amaurornis phoenicurus</i>          | NC_024593           |
| <i>Amazilia versicolor</i>             | NC_024156           |
| <i>Amazona barbadensis</i>             | JX524615            |
| <i>Amazona ochrocephala</i>            | NC_027840           |
| <i>Amblyramphus holosericeus</i>       | NC_018802           |
| <i>Anas acuta</i>                      | NC_024631           |
| <i>Anas chathamica</i>                 | KF562761            |
| <i>Anas clypeata</i>                   | NC_028346           |
| <i>Anas crecca</i>                     | NC_022452           |

|                                       |           |
|---------------------------------------|-----------|
| <i>Anas formosa</i>                   | NC_015482 |
| <i>Anas platyrhynchos</i>             | NC_009684 |
| <i>Anas poecilorhyncha</i>            | NC_022418 |
| <i>Anhinga rufa</i>                   | GU071055  |
| <i>Anomalopteryx didiformis</i>       | NC_002779 |
| <i>Anser albifrons</i>                | NC_004539 |
| <i>Anser anser</i>                    | NC_011196 |
| <i>Anser cygnoides</i>                | NC_023832 |
| <i>Anser fabalis</i>                  | NC_016922 |
| <i>Anser indicus</i>                  | NC_025654 |
| <i>Anseranas semipalmata</i>          | NC_005933 |
| <i>Anthornis melanura</i>             | KC545408  |
| <i>Anthropoides paradiseus</i>        | NC_020572 |
| <i>Anthropoides virgo</i>             | NC_020573 |
| <i>Anthus hodgsoni</i>                | KX189345  |
| <i>Anthus novaeseelandiae</i>         | NC_029137 |
| <i>Aphrodroma brevirostris</i>        | NC_007174 |
| <i>Aptenodytes forsteri</i>           | NC_027938 |
| <i>Apteryx australis</i>              | KU695537  |
| <i>Apteryx haastii</i>                | NC_002782 |
| <i>Apteryx owenii</i>                 | NC_013806 |
| <i>Apus apus</i>                      | NC_008540 |
| <i>Aquila chrysaetos</i>              | NC_024087 |
| <i>Ara ararauna</i>                   | NC_029319 |
| <i>Ara glaucogularis</i>              | NC_026029 |
| <i>Ara militaris</i>                  | NC_027839 |
| <i>Aratinga (Psittaccara) mitrata</i> | JX215256  |
| <i>Arborophila ardens</i>             | NC_022683 |
| <i>Arborophila brunneopectus</i>      | NC_022684 |
| <i>Arborophila gingica</i>            | FJ752425  |
| <i>Arborophila rufipectus</i>         | NC_012453 |
| <i>Arborophila rufogularis</i>        | NC_020584 |
| <i>Archilochus colubris</i>           | NC_010094 |
| <i>Ardea cinerea</i>                  | NC_025900 |
| <i>Ardea intermedia</i>               | NC_025918 |
| <i>Ardea modesta</i>                  | NC_025916 |
| <i>Ardea novaehollandiae</i>          | NC_008551 |
| <i>Ardea purpurea</i>                 | NC_025919 |
| <i>Ardeola bacchus</i>                | NC_025921 |
| <i>Arenaria interpres</i>             | NC_003712 |
| <i>Argusianus argus</i>               | JQ713768  |
| <i>Arremon aurantirostris</i>         | NC_027731 |

|                                        |           |
|----------------------------------------|-----------|
| <i>Asio flammeus</i>                   | NC_027606 |
| <i>Athene brama</i>                    | KF961185  |
| <i>Aythya americana</i>                | NC_000877 |
| <i>Aythya ferina</i>                   | NC_024602 |
| <i>Aythya fuligula</i>                 | NC_024595 |
| <i>Babax lanceolatus</i>               | KR818090  |
| <i>Balaeniceps rex</i>                 | GU071053  |
| <i>Balearica pavonina</i>              | NC_020570 |
| <i>Balearica regulorum</i>             | NC_020569 |
| <i>Bambusicola fytchii</i>             | NC_020583 |
| <i>Bambusicola thoracica</i>           | NC_011816 |
| <i>Bombycilla cedrorum</i>             | KJ909187  |
| <i>Botaurus stellaris</i>              | NC_025923 |
| <i>Branta bernicla</i>                 | KJ680301  |
| <i>Branta canadensis</i>               | NC_007011 |
| <i>Brotogeris cyanoptera</i>           | NC_015530 |
| <i>Bubo blakistoni</i>                 | LC099103  |
| <i>Bubo bubo</i>                       | AB918148  |
| <i>Bubo flavipes</i>                   | LC099100  |
| <i>Bubulcus ibis</i>                   | NC_025917 |
| <i>Bucorvus leadbeateri</i>            | NC_015199 |
| <i>Buteo buteo</i>                     | NC_003128 |
| <i>Buteo hemilasius</i>                | NC_029377 |
| <i>Buteo lagopus</i>                   | NC_029189 |
| <i>Butorides striata</i>               | NC_025922 |
| <i>Bycanistes brevis</i>               | NC_015201 |
| <i>Cacatua moluccensis</i>             | NC_020592 |
| <i>Cacatua pastinator</i>              | JF414240  |
| <i>Cairina moschata</i>                | NC_010965 |
| <i>Callaeas cinereus</i>               | NC_031350 |
| <i>Callipepla squamata</i>             | NC_029340 |
| <i>Calliphlox amethystina</i>          | NC_030286 |
| <i>Caloperdix oculeus</i>              | NC_024619 |
| <i>Calyptorhynchus baudinii</i>        | NC_020594 |
| <i>Calyptorhynchus lathami</i>         | NC_020593 |
| <i>Calyptorhynchus latirostris</i>     | NC_020595 |
| <i>Campephilus guatemalensis</i>       | NC_028020 |
| <i>Campephilus imperialis</i>          | KU158198  |
| <i>Campylorhynchus brunneicapillus</i> | NC_029482 |
| <i>Campylorhynchus zonatus</i>         | NC_022840 |
| <i>Caprimulgus indicus</i>             | NC_025773 |
| <i>Cardinalis cardinalis</i>           | NC_025618 |
| <i>Carduelis (Spinus) psaltria</i>     | NC_025627 |
| <i>Carduelis (Spinus) spinus</i>       | NC_015198 |
| <i>Carduelis pinus</i>                 | NC_025619 |
| <i>Carduelis sinica</i>                | NC_015196 |

|                                      |           |
|--------------------------------------|-----------|
| <i>Carpodacus erythrinus</i>         | NC_025597 |
| <i>Carpodacus roseus</i>             | NC_025607 |
| <i>Casuaris casuaris</i>             | NC_002778 |
| <i>Cathartes aura</i>                | NC_007628 |
| <i>Cecropis daurica</i>              | NC_024107 |
| <i>Centropus sinensis</i>            | KT947122  |
| <i>Ceryle rudis</i>                  | NC_024280 |
| <i>Chaetura pelagica</i>             | NC_028545 |
| <i>Chalcophaps indica</i>            | HM746789  |
| <i>Chlorophanes spiza</i>            | NC_025606 |
| <i>Chroicocephalus ridibundus</i>    | NC_025649 |
| <i>Chrysolampis mosquitos</i>        | NC_025786 |
| <i>Chrysolophus amherstiae</i>       | NC_020590 |
| <i>Chrysolophus pictus</i>           | NC_014576 |
| <i>Chrysomus cyanopus</i>            | NC_018813 |
| <i>Chrysomus icterocephalus</i>      | NC_018799 |
| <i>Chrysomus ruficapillus</i>        | NC_018796 |
| <i>Chrysomus thilius</i>             | NC_018807 |
| <i>Chrysomus xanthophthalmus</i>     | NC_018798 |
| <i>Ciconia boyciana</i>              | NC_002196 |
| <i>Ciconia ciconia</i>               | NC_002197 |
| <i>Ciconia nigra</i>                 | NC_023946 |
| <i>Cnemotriccus fuscatus</i>         | NC_007975 |
| <i>Coccothraustes coccothraustes</i> | NC_025614 |
| <i>Colinus virginianus</i>           | NC_024620 |
| <i>Columba janthina</i>              | KM926619  |
| <i>Columba livia</i>                 | NC_013978 |
| <i>Copsychus saularis</i>            | NC_030603 |
| <i>Coracopsis vasa</i>               | NC_027841 |
| <i>Corvus brachyrhynchos</i>         | NC_026461 |
| <i>Corvus cornix</i>                 | NC_024698 |
| <i>Corvus frugilegus</i>             | NC_002069 |
| <i>Corvus hawaiiensis</i>            | NC_026783 |
| <i>Corvus macrorhynchos</i>          | NC_027173 |
| <i>Corvus moriorum</i>               | NC_031518 |
| <i>Corvus splendens</i>              | NC_024607 |
| <i>Coturnicops exquisitus</i>        | NC_012143 |
| <i>Coturnix chinensis</i>            | NC_004575 |
| <i>Coturnix japonica</i>             | NC_003408 |
| <i>Crax daubentoni</i>               | NC_024617 |
| <i>Crax rubra</i>                    | NC_024618 |
| <i>Crossoptilon auritum</i>          | NC_015897 |
| <i>Crossoptilon crossoptilon</i>     | NC_016679 |
| <i>Crossoptilon harmani</i>          | NC_026547 |
| <i>Crossoptilon mantchuricum</i>     | NC_026548 |
| <i>Crotophaga ani</i>                | HM746794  |

|                                                |           |
|------------------------------------------------|-----------|
| <i>Cuculus poliocephalus</i>                   | NC_028414 |
| <i>Curaeus curaeus</i>                         | NC_018808 |
| <i>Cyanistes cyanus</i>                        | KX388472  |
| <i>Cyanopica cyanus</i>                        | NC_015824 |
| <i>Cyanoptila cyanomelana</i>                  | NC_015232 |
| <i>Cygnus atratus</i>                          | NC_012843 |
| <i>Cygnus columbianus</i>                      | NC_017604 |
| <i>Cygnus cygnus</i>                           | NC_027095 |
| <i>Cygnus olor</i>                             | NC_027096 |
| <i>Dendrocopos leucotos</i>                    | NC_029862 |
| <i>Dendrocopos major</i>                       | NC_028174 |
| <i>Dendrocygna javanica</i>                    | NC_012844 |
| <i>Deropterus accipitrinus</i>                 | KM611476  |
| <i>Dinornis giganteus</i>                      | NC_002672 |
| <i>Diomedea chrysostoma</i>                    | AP009193  |
| <i>Dives dives</i>                             | NC_018800 |
| <i>Dromaius novaehollandiae</i>                | NC_002784 |
| <i>Dryocopus pileatus</i>                      | NC_008546 |
| <i>Dupetor flavicollis</i>                     | NC_024575 |
| <i>Eclectus roratus</i>                        | NC_027842 |
| <i>Ectopistes migratorius</i>                  | KC489473  |
| <i>Egretta eulophotes</i>                      | NC_009736 |
| <i>Egretta garzetta</i>                        | NC_023981 |
| <i>Egretta sacra</i>                           | NC_025920 |
| <i>Emberiza (Schoeniclus) elegans</i>          | NC_030368 |
| <i>Emberiza (Schoeniclus) rustica</i>          | NC_024924 |
| <i>Emberiza (Schoeniclus) spodocephala</i>     | NC_021445 |
| <i>Emberiza aureola (Schoeniclus aureolus)</i> | NC_022150 |
| <i>Emberiza chrysophrys</i>                    | NC_015233 |
| <i>Emberiza cioides</i>                        | NC_024524 |
| <i>Emberiza jankowskii</i>                     | NC_027251 |
| <i>Emberiza pusilla</i>                        | NC_021408 |
| <i>Emberiza rutila</i>                         | NC_024925 |
| <i>Emberiza tristrami</i>                      | NC_015234 |
| <i>Emeus crassus</i>                           | NC_002673 |
| <i>Eophona migratoria</i>                      | NC_031374 |
| <i>Eopsaltria australis</i>                    | NC_019665 |
| <i>Eopsaltria georgiana</i>                    | NC_027230 |
| <i>Eopsaltria griseogularis</i>                | NC_027229 |
| <i>Epthianura albifrons</i>                    | NC_019664 |
| <i>Eremopsaltria mongolica</i>                 | NC_025616 |
| <i>Eudocimus ruber</i>                         | NC_027504 |
| <i>Eudromia elegans</i>                        | NC_002772 |
| <i>Eudynamys taitensis</i>                     | NC_011709 |
| <i>Eudyptes chrysocome</i>                     | NC_008138 |

|                                    |           |
|------------------------------------|-----------|
| <i>Eudyptula minor</i>             | NC_004538 |
| <i>Eulabeornis castaneiventris</i> | NC_025501 |
| <i>Euphagus cyanocephalus</i>      | NC_018827 |
| <i>Eupsittula pertinax</i>         | NC_015197 |
| <i>Eurynorhynchus pygmeus</i>      | NC_027496 |
| <i>Eurystomus orientalis</i>       | NC_011716 |
| <i>Falco cherrug</i>               | NC_026715 |
| <i>Falco columbarius</i>           | NC_025579 |
| <i>Falco naumanni</i>              | NC_029846 |
| <i>Falco peregrinus</i>            | NC_000878 |
| <i>Falco rusticolus</i>            | NC_029359 |
| <i>Falco sparverius</i>            | NC_008547 |
| <i>Falco tinnunculus</i>           | NC_011307 |
| <i>Ficedula zanthopygia</i>        | NC_015802 |
| <i>Fidicula albicollis</i>         | NC_021621 |
| <i>Florisuga fusca</i>             | NC_030287 |
| <i>Florisuga mellivora</i>         | NC_027455 |
| <i>Forpus modestus</i>             | HM755882  |
| <i>Forpus passerinus</i>           | NC_027843 |
| <i>Francolinus pintadeanus</i>     | NC_011817 |
| <i>Fregata sp.</i>                 | AP009192  |
| <i>Fringilla coelebs</i>           | NC_025599 |
| <i>Fringilla montifringilla</i>    | NC_024048 |
| <i>Fringilla polatzeki</i>         | NC_031157 |
| <i>Fringilla teydea</i>            | KU705760  |
| <i>Fulica atra</i>                 | NC_025500 |
| <i>Gallolium luzonica</i>          | HM746790  |
| <i>Gallinula chloropus</i>         | NC_028408 |
| <i>Gallinula chloropus</i>         | NC_015236 |
| <i>Gallirallus australis</i>       | KF425525  |
| <i>Gallirallus okinawae</i>        | NC_012140 |
| <i>Gallirallus philippensis</i>    | NC_025507 |
| <i>Gallus gallus</i>               | NC_001323 |
| <i>Gallus lafayetii</i>            | NC_007239 |
| <i>Gallus sonneratii</i>           | NC_007240 |
| <i>Gallus varius</i>               | NC_007238 |
| <i>Garrulax affinis</i>            | NC_029402 |
| <i>Garrulax canorus</i>            | NC_020429 |
| <i>Garrulax cineraceus</i>         | NC_024553 |
| <i>Garrulax ocellatus</i>          | NC_027657 |
| <i>Garrulax perspicillatus</i>     | NC_026068 |
| <i>Garrulax poecilorhynchus</i>    | NC_028082 |
| <i>Garrulax sannio</i>             | NC_028186 |
| <i>Garrulus glandarius</i>         | NC_015810 |
| <i>Gavia pacifica</i>              | NC_008139 |
| <i>Gavia stellata</i>              | NC_007007 |

|                                  |           |
|----------------------------------|-----------|
| <i>Geococcyx californianus</i>   | NC_011711 |
| <i>Geopelia striata</i>          | HM746791  |
| <i>Geospiza fortis</i>           | KM891730  |
| <i>Geotrygon violacea</i>        | NC_015207 |
| <i>Gerygone igata</i>            | NC_029139 |
| <i>Glaucidium brodiei</i>        | KP684122  |
| <i>Gnorimopsar chopi</i>         | NC_018795 |
| <i>Gorsachius goisagi</i>        | NC_028194 |
| <i>Gorsachius magnificus</i>     | NC_028193 |
| <i>Gorsachius melanolophus</i>   | NC_028195 |
| <i>Goura cristata</i>            | LN589994  |
| <i>Goura scheepmakeri</i>        | NC_027947 |
| <i>Goura victoria</i>            | LN589993  |
| <i>Gracula religiosa</i>         | NC_015898 |
| <i>Grus americana</i>            | NC_020576 |
| <i>Grus antigone</i>             | NC_020581 |
| <i>Grus canadensis</i>           | NC_020582 |
| <i>Grus carunculatus</i>         | NC_020571 |
| <i>Grus grus</i>                 | NC_020577 |
| <i>Grus japonensis</i>           | NC_020575 |
| <i>Grus leucogeranus</i>         | NC_020574 |
| <i>Grus monacha</i>              | NC_020578 |
| <i>Grus nigricollis</i>          | NC_020579 |
| <i>Grus rubicunda</i>            | NC_020580 |
| <i>Grus vipio</i>                | NC_021368 |
| <i>Gymnomystax mexicanus</i>     | NC_018812 |
| <i>Haematopus ater</i>           | NC_003713 |
| <i>Haemorhous cassinii</i>       | NC_025613 |
| <i>Haemorhous mexicanus</i>      | NC_025610 |
| <i>Halcyon coromanda</i>         | NC_028177 |
| <i>Halcyon pileata</i>           | NC_024198 |
| <i>Halcyon smyrnensis</i>        | KT965614  |
| <i>Heliodoxa aurescens</i>       | NC_030285 |
| <i>Heliornis fulica</i>          | NC_025499 |
| <i>Hemignathus flavus</i>        | NC_025608 |
| <i>Hemignathus parvus</i>        | NC_025622 |
| <i>Hemignathus stejnegeri</i>    | NC_025624 |
| <i>Hemignathus virens</i>        | KM078788  |
| <i>Hemiphaga novaeseelandiae</i> | NC_013244 |
| <i>Henicorhina leucosticta</i>   | NC_024673 |
| <i>Hesperiphona vespertina</i>   | NC_025600 |
| <i>Heteralocha acutirostris</i>  | NC_031351 |
| <i>Hieraaetus fasciatus</i>      | NC_029188 |
| <i>Himatione sanguinea</i>       | NC_025602 |
| <i>Hirundo rustica</i>           | KX398931  |
| <i>Hyliota flavigaster</i>       | NC_024868 |

|                                               |           |
|-----------------------------------------------|-----------|
| <i>Hylocharis cyanus</i>                      | NC_027453 |
| <i>Ichthyaelus relictus</i>                   | NC_023777 |
| <i>Icterus mesomelas</i>                      | JX516068  |
| <i>Ithaginis cruentus</i>                     | NC_018033 |
| <i>Ixobrychus cinnamomeus</i>                 | NC_015077 |
| <i>Ixobrychus eurhythmus</i>                  | NC_025924 |
| <i>Ixobrychus sinensis</i>                    | NC_025925 |
| <i>Jacana jacana</i>                          | NC_024069 |
| <i>Jacana spinosa</i>                         | NC_024068 |
| <i>Lamprosar tanagrinus</i>                   | JX516057  |
| <i>Lanius cristatus</i>                       | NC_028333 |
| <i>Lanius isabellinus</i>                     | NC_027655 |
| <i>Lanius schach</i>                          | NC_030604 |
| <i>Lanius sphenocercus</i>                    | KU884610  |
| <i>Lanius tephronotus</i>                     | NC_021105 |
| <i>Larus brunnicephalus</i>                   | NC_018548 |
| <i>Larus crassirostris</i>                    | NC_025556 |
| <i>Larus dominicanus</i>                      | NC_007006 |
| <i>Larus vegae</i>                            | NC_029383 |
| <i>Leiothrix argentauris</i>                  | NC_015114 |
| <i>Leiothrix lutea</i>                        | NC_020427 |
| <i>Lepidothrix coronata</i>                   | KJ909196  |
| <i>Leptotila verreauxi</i>                    | NC_015190 |
| <i>Leucocarbo (Phalacrocorax) chalconotus</i> | GU071054  |
| <i>Leucosticte arctoa</i>                     | NC_025615 |
| <i>Leucosticte brandti</i>                    | NC_025604 |
| <i>Lewinia muelleri</i>                       | NC_025502 |
| <i>Lonchura punctulata</i>                    | NC_028036 |
| <i>Lonchura striata</i>                       | NC_029475 |
| <i>Lophophanes dichrous</i>                   | KX388477  |
| <i>Lophophorus lhuysii</i>                    | NC_013979 |
| <i>Lophophorus sclateri</i>                   | NC_020589 |
| <i>Lophura ignita</i>                         | NC_010781 |
| <i>Lophura nycthemera</i>                     | NC_012895 |
| <i>Lophura swinhoii</i>                       | NC_023779 |
| <i>Loxia curvirostra</i>                      | NC_025623 |
| <i>Loxops caeruleirostris</i>                 | NC_025605 |
| <i>Loxops coccineus</i>                       | NC_025612 |
| <i>Loxops mana</i>                            | NC_025598 |
| <i>Luscinia calliope</i>                      | NC_015074 |
| <i>Luscinia cyanura</i>                       | NC_026067 |
| <i>Lyrurus tetrix</i>                         | NC_024554 |
| <i>Machlolophus spilonotus</i>                | KX388476  |
| <i>Macroagelaius imthurni</i>                 | NC_018810 |
| <i>Malurus melanocephalus</i>                 | NC_024873 |
| <i>Mareca (Anas) falcata</i>                  | NC_023352 |

|                                          |           |
|------------------------------------------|-----------|
| <i>Megalurus pryeri</i>                  | NC_029151 |
| <i>Megalurus punctatus</i>               | NC_029138 |
| <i>Melamprosops phaeosoma</i>            | NC_025617 |
| <i>Meleagris gallopavo</i>               | NC_010195 |
| <i>Meleagris ocellata</i>                | KU094576  |
| <i>Melophus lathami</i>                  | KX702277  |
| <i>Melopsittacus undulatus</i>           | NC_009134 |
| <i>Menura novaehollandiae</i>            | NC_007883 |
| <i>Mergus squamatus</i>                  | NC_016723 |
| <i>Micrastur gilvicolis</i>              | NC_008548 |
| <i>Minla ignotincta</i>                  | NC_030588 |
| <i>Mionectes oleagineus</i>              | NC_024682 |
| <i>Moho braccatus</i>                    | NC_031348 |
| <i>Mohoua novaeseelandiae</i>            | KC545409  |
| <i>Molothrus aeneus</i>                  | NC_018806 |
| <i>Molothrus badius</i>                  | NC_018811 |
| <i>Montifringilla adamsi</i>             | NC_025913 |
| <i>Montifringilla nivalis</i>            | NC_025911 |
| <i>Montifringilla ruficollis</i>         | NC_022815 |
| <i>Montifringilla taczanowskii</i>       | NC_025914 |
| <i>Morus serrator</i>                    | GU071056  |
| <i>Motacilla alba</i>                    | NC_029229 |
| <i>Motacilla cinerea</i>                 | NC_027933 |
| <i>Motacilla lugens</i>                  | NC_029703 |
| <i>Mullerornis agilis</i>                | KJ749825  |
| <i>Myadestes myadestinus</i>             | NC_031352 |
| <i>Myiopsitta monachus</i>               | NC_027844 |
| <i>Nannopterum brasilianus</i>           | NC_029758 |
| <i>Neophema chrysogaster</i>             | NC_019804 |
| <i>Nesopsar nigerrimus</i>               | NC_018794 |
| <i>Nestor notabilis</i>                  | NC_027845 |
| <i>Netta rufina</i>                      | NC_024922 |
| <i>Ninox novaeseelandiae</i>             | NC_005932 |
| <i>Ninox scutulata</i>                   | NC_029384 |
| <i>Nipponia nippon</i>                   | NC_008132 |
| <i>Nisaetus alboniger</i>                | NC_007599 |
| <i>Nisaetus nipalensis</i>               | NC_007598 |
| <i>Notiomystis cincta</i>                | NC_029140 |
| <i>Nucifraga columbiana</i>              | NC_022839 |
| <i>Numenius phaeopus</i>                 | NC_030507 |
| <i>Numida meleagris</i>                  | NC_006382 |
| <i>Nyctibius grandis</i>                 | EU344977  |
| <i>Nyctibius griseus</i>                 | HM746792  |
| <i>Nycticorax nycticorax</i>             | NC_015807 |
| <i>Nymphicus hollandicus</i>             | NC_015192 |
| <i>Oedistoma iliolophum (iliolophus)</i> | NC_024865 |

|                                   |           |
|-----------------------------------|-----------|
| <i>Oreomystis bairdi</i>          | NC_025628 |
| <i>Oreopsar bolivianus</i>        | NC_018797 |
| <i>Oreotrochilus melanogaster</i> | NC_027454 |
| <i>Oriolus chinensis</i>          | NC_020424 |
| <i>Orthopsittaca manilata</i>     | NC_029161 |
| <i>Otis tarda</i>                 | NC_014046 |
| <i>Otus bakkamoena</i>            | NC_028163 |
| <i>Otus scops</i>                 | NC_028162 |
| <i>Pachyplichas yaldwyni</i>      | KX369036  |
| <i>Padda oryzivora</i>            | NC_028441 |
| <i>Pandion haliaetus</i>          | NC_008550 |
| <i>Paradoxornis fulvifrons</i>    | NC_028436 |
| <i>Paradoxornis nipalensis</i>    | NC_028437 |
| <i>Paradoxornis webbianus</i>     | NC_024539 |
| <i>Paroreomyza montana</i>        | NC_025601 |
| <i>Parus major</i>                | NC_026293 |
| <i>Parus monticolus</i>           | NC_028187 |
| <i>Parus venustulus</i>           | NC_026701 |
| <i>Passer ammodendri</i>          | NC_029344 |
| <i>Passer domesticus</i>          | NC_025611 |
| <i>Passer montanus</i>            | NC_024821 |
| <i>Pavo cristatus</i>             | NC_024533 |
| <i>Pavo muticus</i>               | NC_012897 |
| <i>Pelagodroma marina</i>         | KC875856  |
| <i>Pelecanus conspicillatus</i>   | DQ780883  |
| <i>Penelopides panini</i>         | NC_015087 |
| <i>Perdix dauurica</i>            | NC_020588 |
| <i>Perdix hodgsoniae</i>          | NC_023940 |
| <i>Pericrocotus ethologus</i>     | NC_024257 |
| <i>Periparus ater</i>             | NC_026223 |
| <i>Petroica australis</i>         | NC_029141 |
| <i>Petroica boodang</i>           | NC_019666 |
| <i>Petroica goodenovii</i>        | NC_019667 |
| <i>Petroica macrocephala</i>      | NC_029142 |
| <i>Petroica phoenicea</i>         | NC_019668 |
| <i>Phaethon lepturus</i>          | NC_027275 |
| <i>Phaethon rubricauda</i>        | NC_007979 |
| <i>Phaethornis hispidus</i>       | KP853098  |
| <i>Phaethornis malaris</i>        | NC_030288 |
| <i>Phalacrocorax carbo</i>        | NC_027267 |
| <i>Phalcooboenus australis</i>    | KP064202  |
| <i>Phasianus colchicus</i>        | NC_015526 |
| <i>Phasianus versicolor</i>       | NC_010778 |
| <i>Philesturnus carunculatus</i>  | NC_029143 |
| <i>Phodilus badius</i>            | NC_023787 |
| <i>Phoebastria albatrus</i>       | NC_026190 |

|                                      |                         |
|--------------------------------------|-------------------------|
| <i>Phoebastria immutabilis</i>       | NC_026189               |
| <i>Phoebastria nigripes</i>          | NC_026188               |
| <i>Phoenicopterus roseus</i>         | NC_010089               |
| <i>Phoenicopterus ruber</i>          | NC_027934               |
| <i>Phoenicurus auroreus</i>          | NC_026066               |
| <i>Pica pica</i>                     | NC_015200               |
| <i>Picathartes gymnocephalus</i>     | KJ909200                |
| <i>Picoides pubescens</i>            | NC_027936               |
| <i>Pinguinus impennis</i>            | NC_031347               |
| <i>Pinicola enucleator</i>           | NC_025609               |
| <i>Pipile pipile</i>                 | KU221053                |
| <i>Pitta nympha</i>                  | NC_027067               |
| <i>Platalea leucorodia</i>           | NC_012772               |
| <i>Platalea minor</i>                | NC_010962               |
| <i>Podiceps cristatus</i>            | NC_008140               |
| <i>Podoces hendersoni</i>            | NC_014879               |
| <i>Poecile atricapilla</i>           | NC_024867               |
| <i>Poecile montanus</i>              | KX388479                |
| <i>Poecile palustris</i>             | NC_026911               |
| <i>Polyplectron bicalcaratum</i>     | NC_012900               |
| <i>Polyplectron germaini</i>         | NC_023264               |
| <i>Polyplectron napoleonis</i>       | NC_024615               |
| <i>Pomatorhinus ruficollis</i>       | NC_029769               |
| <i>Poospiza cabanisi</i>             | NC_028038               |
| <i>Poospiza lateralis</i>            | NC_028039               |
| <i>Poospiza thoracica</i>            | NC_028037               |
| <i>Porphyrio hochstetteri</i>        | NC_010092               |
| <i>Porphyrio porphyrio</i>           | NC_025508               |
| <i>Primolius couloni</i>             | NC_025742               |
| <i>Primolius maracana</i>            | NC_029322               |
| <i>Prioniturus luconensis</i>        | NC_027846               |
| <i>Procellaria cinerea</i>           | AP009191                |
| <i>Progne chalybea</i>               | NC_020605               |
| <i>Prosthemadera novaeseelandiae</i> | NC_029144               |
| <i>Prunella montanella</i>           | NC_027284               |
| <i>Prunella strophiatea</i>          | KU975800                |
| <i>Psephotellus pulcherrimus</i>     | NC_031358               |
| <i>Pseudoleistes guirahuro</i>       | NC_018809               |
| <i>Pseudoleistes virescens</i>       | NC_018805               |
| <i>Pseudonestor xanthophrys</i>      | NC_025630               |
| <i>Pseudopodoces humilis</i>         | NC_014341               |
| <i>Psittacara acuticaudatus</i>      | NC_020325               |
| <i>Psittacara brevipes</i>           | NC_021764               |
| <i>Psittacara rubritorquis</i>       | NC_026042               |
| <i>Psittacus erithacus</i>           | NC_027847 /<br>KM611474 |

|                                 |           |
|---------------------------------|-----------|
| <i>Psittirostra psittacea</i>   | NC_031353 |
| <i>Psittirichas fulgidus</i>    | NC_027848 |
| <i>Pterocnemia pennata</i>      | NC_002783 |
| <i>Pteroglossus azara</i>       | NC_008549 |
| <i>Ptilopachus petrosus</i>     | NC_024616 |
| <i>Pucrasia macrolopha</i>      | NC_020587 |
| <i>Pycnonotus melanicterus</i>  | NC_024730 |
| <i>Pycnonotus sinensis</i>      | NC_013838 |
| <i>Pycnonotus taivanus</i>      | NC_013483 |
| <i>Pycnonotus xanthorrhous</i>  | KX129905  |
| <i>Pygoscelis adeliae</i>       | NC_021137 |
| <i>Pygoscelis antarcticus</i>   | NC_021474 |
| <i>Pyrgilauda blanfordi</i>     | NC_025912 |
| <i>Pyrgilauda davidiana</i>     | NC_025915 |
| <i>Pyrrhocorax graculus</i>     | NC_025927 |
| <i>Pyrrhocorax pyrrhocorax</i>  | NC_025926 |
| <i>Pyrrhula pyrrhula</i>        | NC_025625 |
| <i>Pyrrhura rupicola</i>        | NC_028404 |
| <i>Quiscalus quiscula</i>       | NC_018803 |
| <i>Rallina eurizonoides</i>     | NC_012142 |
| <i>Recurvirostra avosetta</i>   | NC_027420 |
| <i>Regulus calendula</i>        | NC_024866 |
| <i>Regulus regulus</i>          | NC_029837 |
| <i>Remiz consobrinus</i>        | NC_021641 |
| <i>Rhea americana</i>           | NC_000846 |
| <i>Rhipidura fuliginosa</i>     | NC_029145 |
| <i>Rhynchopsitta terrisi</i>    | NC_021771 |
| <i>Rhynchortyx cinctus</i>      | KJ914547  |
| <i>Rhynochetos jubatus</i>      | NC_010091 |
| <i>Sagittarius serpentarius</i> | NC_023788 |
| <i>Sasia ochracea</i>           | NC_028019 |
| <i>Saundersilarus saundersi</i> | NC_017601 |
| <i>Sceloglaux albifacies</i>    | KX098448  |
| <i>Scolopax rusticola</i>       | NC_025521 |
| <i>Scytalopus magellanicus</i>  | KJ909189  |
| <i>Serinus albogularis</i>      | NC_025595 |
| <i>Serinus canaria</i>          | NC_023375 |
| <i>Serinus dorsostriatus</i>    | NC_025621 |
| <i>Sitta carolinensis</i>       | NC_024870 |
| <i>Smithornis sharpei</i>       | NC_000879 |
| <i>Spheniscus demersus</i>      | NC_022817 |
| <i>Spilornis cheela</i>         | NC_015887 |
| <i>Spizixos semitorques</i>     | NC_029321 |
| <i>Stachyris ruficeps</i>       | NC_030771 |
| <i>Stercorarius maccormicki</i> | NC_026125 |
| <i>Sternula albifrons</i>       | NC_028176 |

|                                    |           |
|------------------------------------|-----------|
| <i>Streptopelia chinensis</i>      | NC_026459 |
| <i>Streptopelia decaocto</i>       | KX372273  |
| <i>Streptopelia orientalis</i>     | NC_031447 |
| <i>Strigops habroptilus</i>        | NC_005931 |
| <i>Strix leptogrammica</i>         | KC953095  |
| <i>Struthio camelus</i>            | NC_002785 |
| <i>Sturnus cineraceus</i>          | NC_015237 |
| <i>Sturnus nigricollis</i>         | NC_020423 |
| <i>Sturnus sericeus</i>            | NC_014455 |
| <i>Sturnus vulgaris</i>            | NC_029360 |
| <i>Sylvia atricapilla</i>          | NC_010228 |
| <i>Sylvia crassirostris</i>        | NC_010229 |
| <i>Sylviparus modestus</i>         | NC_026793 |
| <i>Synthliboramphus antiquus</i>   | NC_007978 |
| <i>Synthliboramphus wumizusume</i> | NC_029328 |
| <i>Syrmaticus ellioti</i>          | NC_010771 |
| <i>Syrmaticus humiae</i>           | NC_010774 |
| <i>Syrmaticus reevesii</i>         | NC_010770 |
| <i>Syrmaticus soemmerringi</i>     | NC_010767 |
| <i>Tachybaptus novaehollandiae</i> | NC_010095 |
| <i>Tachybaptus ruficollis</i>      | NC_024594 |
| <i>Tachycineta albilinea</i>       | NC_020601 |
| <i>Tachycineta albiventer</i>      | NC_020602 |
| <i>Tachycineta bicolor</i>         | NC_020596 |
| <i>Tachycineta cyaneoviridis</i>   | NC_020599 |
| <i>Tachycineta euchrysea</i>       | NC_020598 |
| <i>Tachycineta leucorrohoa</i>     | NC_020603 |
| <i>Tachycineta meyeri</i>          | NC_020604 |
| <i>Tachycineta stolzmanni</i>      | NC_020600 |
| <i>Tachycineta thalassina</i>      | NC_020597 |
| <i>Tadorna ferruginea</i>          | NC_024640 |
| <i>Tadorna tadorna</i>             | NC_024750 |
| <i>Taeniopygia guttata</i>         | NC_007897 |
| <i>Tanygnathus lucionensis</i>     | KM611480  |
| <i>Tetraogallus himalayensis</i>   | NC_027279 |
| <i>Tetraogallus tibetanus</i>      | NC_023939 |
| <i>Tetraophasis obscurus</i>       | NC_018034 |
| <i>Tetraophasis szechenyii</i>     | NC_020613 |
| <i>Tetrastes bonasia</i>           | NC_020591 |
| <i>Tetrastes sewerzowi</i>         | NC_025318 |
| <i>Thalassarche melanophrys</i>    | NC_007172 |

|                                   |           |
|-----------------------------------|-----------|
| <i>Thamnophilus nigrocinereus</i> | KJ909192  |
| <i>Thraupis episcopus</i>         | NC_025596 |
| <i>Threskiornis aethiopicus</i>   | NC_013146 |
| <i>Tinamus guttatus</i>           | NC_027260 |
| <i>Tinamus major</i>              | NC_002781 |
| <i>Todiramphus sanctus</i>        | NC_011712 |
| <i>Tragopan caboti</i>            | NC_013619 |
| <i>Tragopan temminckii</i>        | NC_020586 |
| <i>Traversia lyalli</i>           | KX369034  |
| <i>Tregellasia capito</i>         | NC_027231 |
| <i>Tregellasia leucops</i>        | NC_024871 |
| <i>Tringa erythropus</i>          | NC_030585 |
| <i>Trogon viridis</i>             | NC_011714 |
| <i>Turdus eunomus</i>             | NC_028273 |
| <i>Turdus hortulorum</i>          | NC_024552 |
| <i>Turdus merula</i>              | NC_028188 |
| <i>Turdus migratorius</i>         | NC_024872 |
| <i>Turdus naumanni</i>            | KJ834096  |
| <i>Turdus philomelos</i>          | NC_029147 |
| <i>Turdus rufiventris</i>         | NC_028179 |
| <i>Turnagra capensis</i>          | NC_028336 |
| <i>Turtur tympanistria</i>        | HM746793  |
| <i>Tyto alba</i>                  | EU410491  |
| <i>Tyto longimembris</i>          | KP893332  |
| <i>Upupa epops</i>                | NC_028178 |
| <i>Uragus sibiricus</i>           | NC_025594 |
| <i>Urocissa erythrorhyncha</i>    | NC_020426 |
| <i>Vanellus cinereus</i>          | NC_025514 |
| <i>Vanellus vanellus</i>          | NC_025637 |
| <i>Vestiaria coccinea</i>         | NC_025620 |
| <i>Vidua chalybeata</i>           | NC_000880 |
| <i>Vireo olivaceus</i>            | NC_024869 |
| <i>Xanthopsar flavus</i>          | NC_018804 |
| <i>Xenicus gilviventris</i>       | KX369033  |
| <i>Xenicus longipes</i>           | KX369035  |
| <i>Yuhina diademata</i>           | NC_029462 |
| <i>Zenaida auriculata</i>         | NC_015203 |
| <i>Zoothera dauma</i>             | KT340629  |
| <i>Zosterops erythropleurus</i>   | NC_027942 |
| <i>Zosterops japonicus</i>        | KT601061  |
| <i>Zosterops lateralis</i>        | NC_029146 |
